# Supplementary material for: Hypoxia‐Induced miR‐210 Overexpression Promotes the Differentiation of Human‐Induced Pluripotent Stem Cells to Hepatocyte‐Like Cells on Random Nanofiber Poly‐L‐Lactic Acid/Poly (ε‐Caprolactone) Scaffolds
Source: Hindawi journal article supplement (doi:10.1155/2021/4229721), 2021-01-01

Supplementary Figure S1

CDNA synthesis steps for miR-210

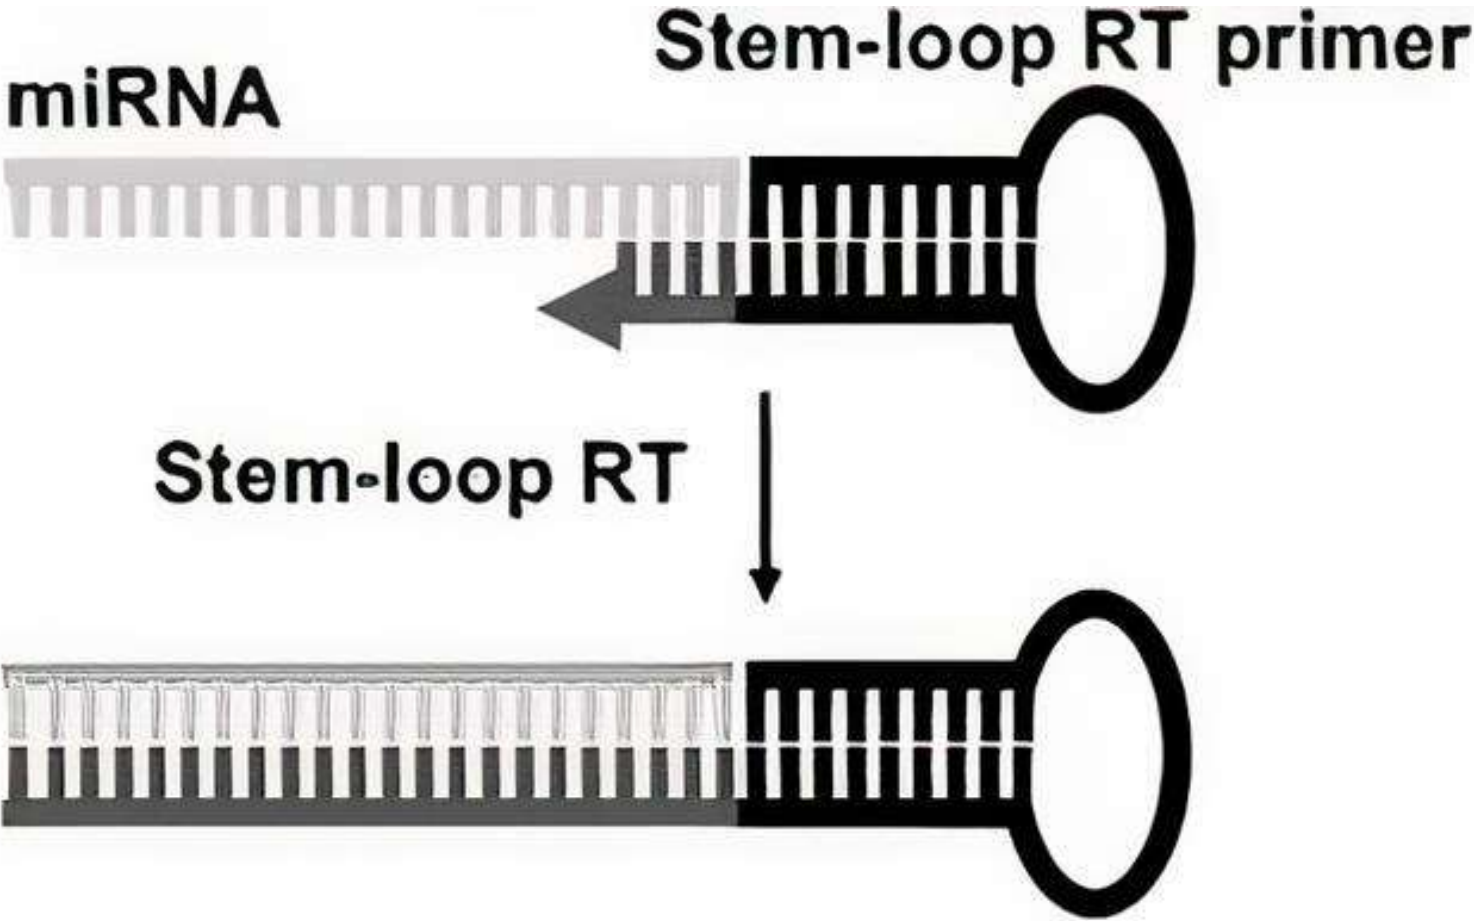

Supplement: f1 [file 4229721.f1.pdf]
